# Supplementary material
Source: publisher site journal article supplement (https://www.dovepress.com/article/266846)

| Table S1. The detailed information of the antibody | | |
| --- | --- | --- |
| Antibody | Item number | Manufacturers |
| CLDN8 | ab211439 | Abcam, USA |
| Vimentin | ab92547 | Abcam, USA |
| β-actin | 7D2C10 | Proteintech, USA |
| E-cadherin | ab1416 | Abcam, USA |
| N-cadherin | ab18203 | Abcam, USA |
| AKT | ab8805 | Abcam, USA |
| p-AKT | ab38449 | Abcam, USA |


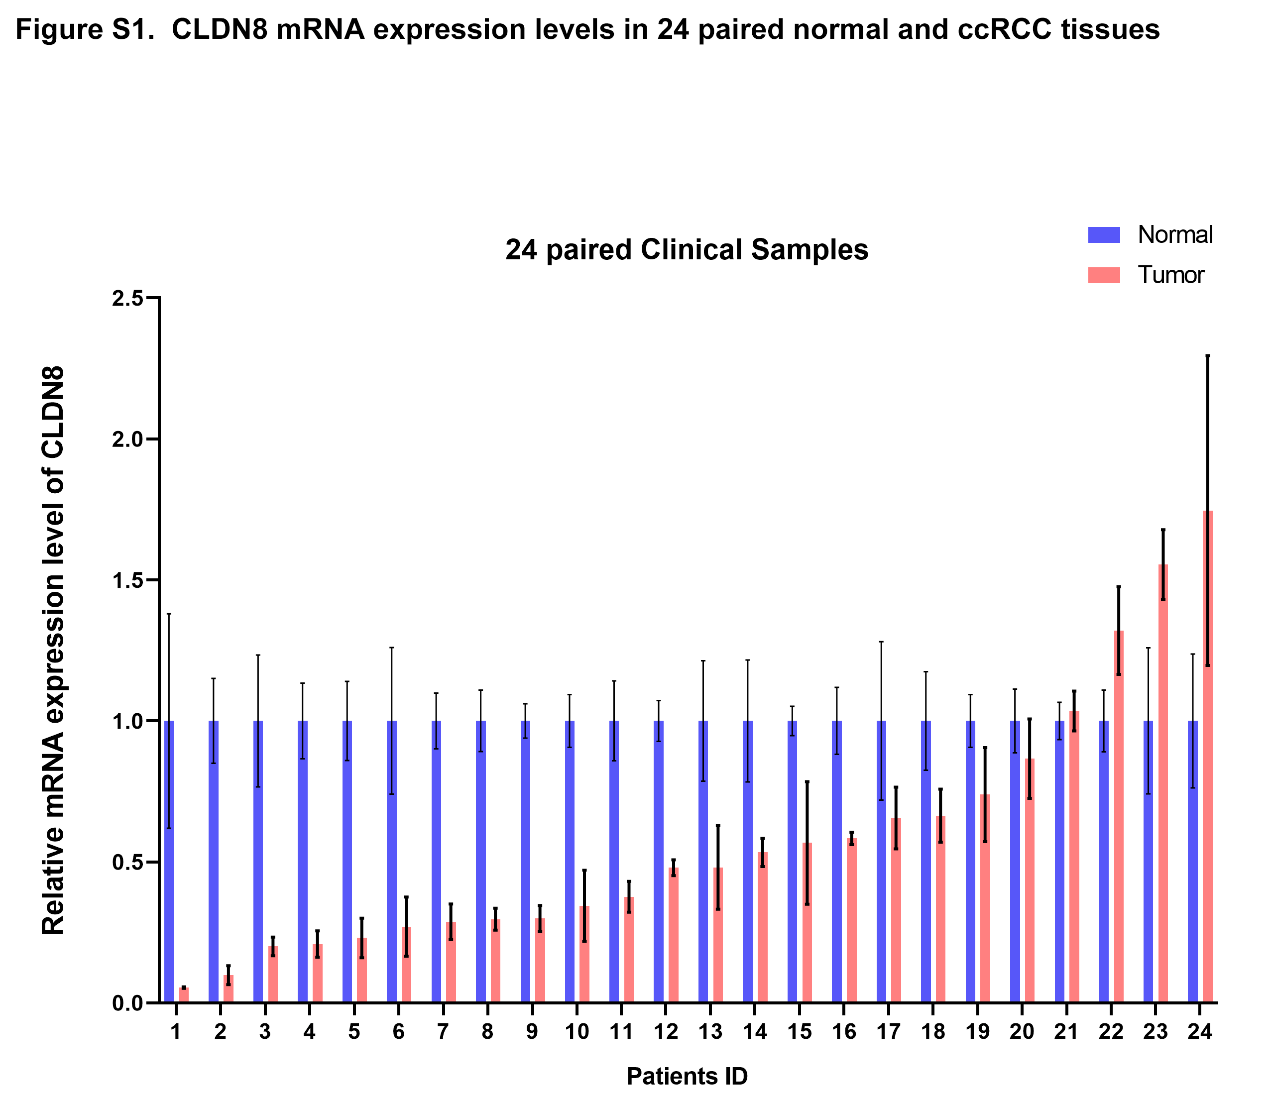

Supplement: Supplementary file 1 [file get_supplementary_file.php]
